# Supplementary material for: Copper(i)-based dye-sensitized solar cells with sterically demanding anchoring ligands: bigger is not always better
Source: Royal Society of Chemistry journal article supplement (doi:10.1039/c5ra07449e), 2015-01-01
Supplement: c5ra07449e1.pdf [file c5ra07449e1.pdf]

ESI to accompany

## Copper(I)-based dye-sensitized solar cells with sterically demanding anchoring ligands: bigger is not always better

Sven Y. Brauchli,<sup>a</sup> Frederik J. Malzner,<sup>a</sup> Edwin C. Constable<sup>a</sup> and Catherine E. Housecroft<sup>\*a</sup>

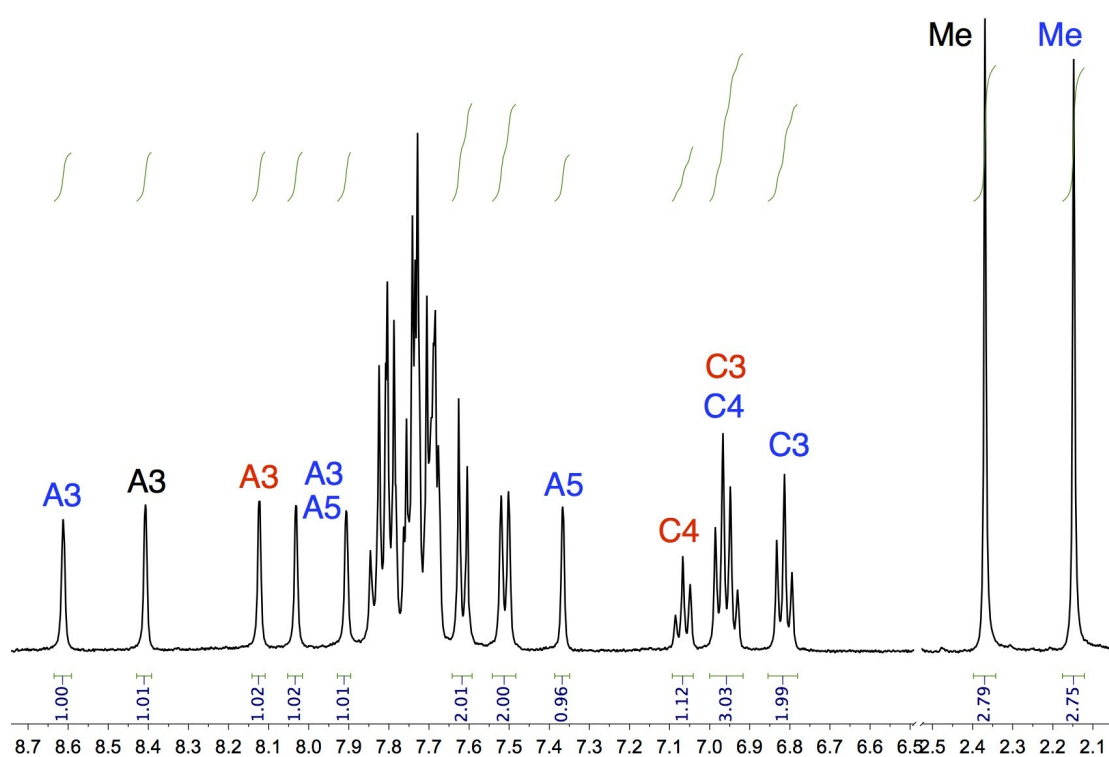

Fig. S1. 500 MHz <sup>1</sup>H NMR spectra of a CD<sub>2</sub>Cl<sub>2</sub> solution of a 1 : 1 mixture of [Cu(3)<sub>2</sub>][PF<sub>6</sub>] and [Cu(4)<sub>2</sub>][PF<sub>6</sub>] demonstrating the statistical (1 : 2 : 1) mixture of [Cu(3)<sub>2</sub>][PF<sub>6</sub>] (black), [Cu(3)(4)][PF<sub>6</sub>] (blue) and [Cu(4)<sub>2</sub>][PF<sub>6</sub>] (red). Ring labelling is given in Scheme 3.
